# Supplementary material for: New Insight Into Crack-Healing Mechanism via Electropulsing Treatment
Source: Springer Nature journal article supplement (doi:10.1007/s11661-023-07073-1), 2023-05-12
Supplement: MOESM1 [file 25355832]

Supplementary Material for:

## New insight into crack healing mechanism via electropulsing treatment

Qing Cai, Mian Zhou, Ebad Bagherpour, Seyedmehdi Hosseini, Chamini Mendis, Isaac Chang\*, Hamid Assadi

Brunel Centre for Advanced Solidification Technology (BCAST), Brunel University London, Uxbridge UB8 3PH, UK

**Table S1.** Material properties of Stainless steel 316L used in Abaqus model

| Temperature | Density           | Elastic modulus  | Poisson ratio | Electrical conductivity            | Thermal expansion coefficient | Specific heat | Thermal Conductivity |
|-------------|-------------------|------------------|---------------|------------------------------------|-------------------------------|---------------|----------------------|
| °C          | kg/m <sup>3</sup> | N/m <sup>2</sup> |               | A·V <sup>-1</sup> ·m <sup>-1</sup> | (m/m/K)                       | J/kg·K        | W/m·K                |
| 20          | 7950              | 2.0E+11          | 0.25          | 1350000                            | 1.65E-05                      | 452           | 14.0                 |
| 100         | 7920              | 1.9E+11          | 0.26          | 1270000                            | 1.65E-05                      | 486           | 13.5                 |
| 200         | 7880              | 1.9E+11          | 0.26          | 1150000                            | 1.65E-05                      | 528           | 14.8                 |
| 300         | 7830              | 1.8E+11          | 0.28          | 1080000                            | 1.75E-05                      | 548           | 16.0                 |
| 400         | 7790              | 1.6E+11          | 0.32          | 1010000                            | 1.80E-05                      | 565           | 17.3                 |
| 500         | 7740              | 1.6E+11          | 0.32          | 979455                             | 1.85E-05                      | 573           | 19.2                 |
| 600         | 7690              | 1.5E+11          | 0.32          | 933091                             | 1.90E-05                      | 586           | 19.9                 |
| 700         | 7640              | 1.4E+11          | 0.31          | 867308                             | 2.00E-05                      | 615           | 20.6                 |
| 800         | 7590              | 1.3E+11          | 0.25          | 783923                             | 2.10E-05                      | 649           | 21.4                 |
| 900         | 7590              | 1.3E+11          | 0.24          | 700538                             | 2.30E-05                      | 650           | 22.1                 |
| 1400        | 7590              | 1.3E+05          | 0.20          | 617154                             | 2.70E-05                      | 681           | 24.2                 |

  

| Johnson-Cook plastic model |          |       |     |              |                 | Latent Heat | Solidus temp | Liquidus temp |
|----------------------------|----------|-------|-----|--------------|-----------------|-------------|--------------|---------------|
| A                          | B        | n     | m   | Melting temp | Transition temp | kJ/kg       | °C           | °C            |
| 310000000                  | 8.81E+08 | 0.178 | 0.6 | 1600         | 25              | 285000      | 1350         | 1550          |

  

| Crack contact properties            |                     |           |
|-------------------------------------|---------------------|-----------|
| Electrical conductance              | Thermal conductance | Clearance |
| A·V <sup>-1</sup> ·mm <sup>-1</sup> | W/mm·K              | mm        |
| 1.00E+07                            | 1.00E+07            | 0         |
| 0                                   | 0                   | 1.00E-07  |
